# Supplementary material
Source: PubMed Central journal article supplement (PMC5624531)

# Estimating the Causal Effect of Fine Particulate Matter Levels on Death and Hospitalization: Are Levels Below the Standards Harmful?

## Supplementary material

|                                                                                                                  |   |
|------------------------------------------------------------------------------------------------------------------|---|
| Summary statistics.....                                                                                          | 1 |
| Propensity score overlap.....                                                                                    | 5 |
| Sensitivity analyses.....                                                                                        | 5 |
| SA1: Continuous exposure and Cox proportional hazard model with linear exposure-response (ER) function .....     | 6 |
| SA2: Continuous exposure and Cox proportional hazard model with non-linear exposure-response (ER) function ..... | 7 |
| SA3: Low pollution cohort results using WHO standard of $10 \mu\text{g}/\text{m}^3$ .....                        | 9 |

## Summary statistics

**Table S1:** Mean and standard deviation of all variables (potential confounders,  $p=122$ ) and of the four health outcomes available in the study. Calculations shown are for the full cohort and computed over all observations (total = 68,789). Study period 2002 to 2010. Variables from US census and USDA are available at the area level (zip codes and county) and mean and standard deviations are calculated across these area-level summaries.

|                       | High Pollution<br>( $> 12 \mu\text{g}/\text{m}^3$ ) |        | Low Pollution<br>( $< 12 \mu\text{g}/\text{m}^3$ ) |        |
|-----------------------|-----------------------------------------------------|--------|----------------------------------------------------|--------|
| Demographic variables | Mean                                                | SD     | Mean                                               | SD     |
| Male (Med)            | 0.440                                               | 0.496  | 0.464                                              | 0.499  |
| Age 65- (Med)         | 0.197                                               | 0.398  | 0.179                                              | 0.383  |
| Age 66-75 (Med)       | 0.324                                               | 0.468  | 0.327                                              | 0.469  |
| Age 76-85 (Med)       | 0.323                                               | 0.468  | 0.332                                              | 0.471  |
| Age 86+ (Med)         | 0.157                                               | 0.364  | 0.162                                              | 0.368  |
| White (Med)           | 0.830                                               | 0.376  | 0.897                                              | 0.303  |
| Black (Med)           | 0.135                                               | 0.342  | 0.063                                              | 0.243  |
| Other race (Med)      | 0.037                                               | 0.188  | 0.041                                              | 0.198  |
| Dual eligible (Med)   | 0.229                                               | 0.420  | 0.196                                              | 0.397  |
| % urban (US Cen)      | 73.850                                              | 33.844 | 70.080                                             | 36.917 |
| % 65+ (US Cen)        | 14.963                                              | 6.093  | 15.842                                             | 7.666  |
| % White (US Cen)      | 74.277                                              | 24.226 | 81.271                                             | 17.498 |

|                                |            |            |            |            |
|--------------------------------|------------|------------|------------|------------|
| % Black (US Cen)               | 16.354     | 22.039     | 8.434      | 13.646     |
| % Asian (US Cen)               | 3.374      | 6.241      | 2.964      | 5.077      |
| % Poor (US Cen)                | 16.006     | 9.038      | 14.852     | 8.688      |
| % in college (US Cen)          | 25.431     | 11.290     | 25.300     | 12.784     |
| % Bachelors + (US Cen)         | 25.027     | 15.874     | 25.784     | 14.797     |
| % Foreign (US Cen)             | 9.239      | 11.277     | 9.647      | 9.862      |
| House value (US Cen)           | 190594.700 | 152377.100 | 190985.900 | 128841.000 |
| Metropolitan, score 1-3 (USDA) | 0.734      | 0.442      | 0.683      | 0.465      |
| Urban score 4-6 (USDA)         | 0.203      | 0.402      | 0.208      | 0.406      |
| Rural score 7-9 (USDA)         | 0.063      | 0.243      | 0.109      | 0.311      |
|                                |            |            |            |            |
|                                |            |            |            |            |
| MCBS Variables                 |            |            |            |            |
| Bad hearing/ vision            | 0.834      | 0.372      | 0.838      | 0.369      |
| Less than high school          | 0.327      | 0.469      | 0.251      | 0.434      |
| High school or more            | 0.660      | 0.474      | 0.736      | 0.441      |
| Good health status             | 0.566      | 0.496      | 0.589      | 0.492      |
| 3+ children                    | 0.460      | 0.498      | 0.499      | 0.500      |
| <= 2 children                  | 0.540      | 0.498      | 0.501      | 0.500      |
| Divorce                        | 0.097      | 0.297      | 0.104      | 0.305      |
| Married                        | 0.447      | 0.497      | 0.484      | 0.500      |
| Unkown marital status          | 0.001      | 0.031      | 0.000      | 0.022      |
| Never married                  | 0.110      | 0.313      | 0.101      | 0.302      |
| Seperated                      | 0.017      | 0.127      | 0.012      | 0.108      |
| Widowed                        | 0.328      | 0.470      | 0.299      | 0.458      |
| Income dec 1                   | 0.108      | 0.310      | 0.091      | 0.287      |
| Income dec 2                   | 0.109      | 0.312      | 0.091      | 0.287      |
| Income dec 3                   | 0.103      | 0.304      | 0.092      | 0.290      |
| Income dec 4                   | 0.098      | 0.298      | 0.090      | 0.286      |
| Income dec 5                   | 0.098      | 0.298      | 0.089      | 0.284      |
| Income dec 6                   | 0.099      | 0.299      | 0.099      | 0.299      |
| Income dec 7                   | 0.101      | 0.302      | 0.105      | 0.307      |
| Income dec 8                   | 0.093      | 0.291      | 0.110      | 0.313      |
| Income dec 9                   | 0.097      | 0.296      | 0.116      | 0.321      |
| Income dec 10                  | 0.093      | 0.291      | 0.117      | 0.321      |
| Employed                       | 0.106      | 0.308      | 0.109      | 0.312      |

|                          |       |       |       |       |
|--------------------------|-------|-------|-------|-------|
| Excellent health status  | 0.121 | 0.327 | 0.148 | 0.355 |
| Fair health status       | 0.217 | 0.412 | 0.186 | 0.389 |
| Poor health status       | 0.095 | 0.294 | 0.077 | 0.267 |
| Health better            | 0.148 | 0.355 | 0.148 | 0.355 |
| Health same              | 0.605 | 0.489 | 0.620 | 0.485 |
| Health worse             | 0.247 | 0.431 | 0.231 | 0.422 |
| Mammogram                | 0.249 | 0.432 | 0.253 | 0.435 |
| Pap smear                | 0.171 | 0.377 | 0.153 | 0.360 |
| Hsterectomy              | 0.180 | 0.385 | 0.161 | 0.368 |
| Rectal prostate exam     | 0.175 | 0.380 | 0.183 | 0.387 |
| Blood test               | 0.262 | 0.440 | 0.280 | 0.449 |
| Flu shot                 | 0.670 | 0.470 | 0.707 | 0.455 |
| Pneumonia shot           | 0.674 | 0.469 | 0.718 | 0.450 |
| Hx smoking               | 0.556 | 0.497 | 0.578 | 0.494 |
| Current smoker           | 0.145 | 0.352 | 0.131 | 0.338 |
| Cataract op              | 0.265 | 0.441 | 0.297 | 0.457 |
| No difficulty stooping   | 0.456 | 0.498 | 0.482 | 0.500 |
| Difficulty stooping      | 0.365 | 0.482 | 0.334 | 0.472 |
| Some difficulty stooping | 0.179 | 0.383 | 0.184 | 0.388 |
| No difficulty lifiting   | 0.672 | 0.469 | 0.707 | 0.455 |
| Difficulty lifting       | 0.230 | 0.421 | 0.198 | 0.398 |
| Some difficulty lifting  | 0.098 | 0.297 | 0.095 | 0.293 |
| No difficulty reaching   | 0.786 | 0.410 | 0.806 | 0.395 |
| Difficulty reaching      | 0.115 | 0.320 | 0.103 | 0.303 |
| Some difficulty reaching | 0.098 | 0.298 | 0.091 | 0.288 |
| No difficulty walking    | 0.564 | 0.496 | 0.604 | 0.489 |
| Difficulty walking       | 0.336 | 0.472 | 0.298 | 0.457 |
| Some difficulty walking  | 0.100 | 0.300 | 0.098 | 0.298 |
| Problems with phone      | 0.084 | 0.277 | 0.081 | 0.272 |
| Problems shopping        | 0.143 | 0.350 | 0.120 | 0.325 |
| Problems bills/money     | 0.089 | 0.285 | 0.079 | 0.269 |
| Hx cancer: skin          | 0.176 | 0.381 | 0.212 | 0.409 |
| Hx cancer                | 0.166 | 0.372 | 0.182 | 0.386 |
| Hx cancer: colon         | 0.023 | 0.151 | 0.024 | 0.152 |
| Hx cancer: breast        | 0.040 | 0.196 | 0.047 | 0.211 |
| Hx cancer: uterus        | 0.016 | 0.125 | 0.016 | 0.124 |

|                            |        |        |        |        |
|----------------------------|--------|--------|--------|--------|
| Hx cancer: prostate        | 0.036  | 0.186  | 0.041  | 0.198  |
| Hx cancer: bladder         | 0.008  | 0.086  | 0.010  | 0.100  |
| Hx cancer: ovary           | 0.006  | 0.079  | 0.007  | 0.080  |
| Hx cancer: stomach         | 0.004  | 0.065  | 0.004  | 0.062  |
| Hx cancer: cervix          | 0.006  | 0.078  | 0.006  | 0.076  |
| Hx diabetes                | 0.213  | 0.410  | 0.203  | 0.402  |
| Hx arthritis               | 0.600  | 0.490  | 0.580  | 0.494  |
| Hx alzheimer               | 0.043  | 0.203  | 0.036  | 0.187  |
| Hx psych                   | 0.155  | 0.361  | 0.137  | 0.344  |
| Hx osteoporosis            | 0.206  | 0.404  | 0.208  | 0.406  |
| Hx broken hip              | 0.039  | 0.193  | 0.037  | 0.190  |
| Hx Parkinsons              | 0.017  | 0.128  | 0.017  | 0.129  |
| BMI                        | 27.223 | 6.064  | 27.227 | 6.016  |
| Obese                      | 0.253  | 0.435  | 0.252  | 0.434  |
|                            |        |        |        |        |
| Medicare Variables         |        |        |        |        |
| Proc digestive sys         | 0.0352 | 0.1843 | 0.0294 | 0.1689 |
| Proc urinary sys           | 0.0075 | 0.0863 | 0.0079 | 0.0887 |
| Proc male genital org      | 0.0030 | 0.0547 | 0.0031 | 0.0554 |
| Proc female genital org    | 0.0031 | 0.0552 | 0.0037 | 0.0604 |
| Obstetrical Procs          | 0.0006 | 0.0235 | 0.0007 | 0.0258 |
| Musculoskeletal procs      | 0.0277 | 0.1640 | 0.0294 | 0.1689 |
| Integumentary sys procs    | 0.0091 | 0.0947 | 0.0078 | 0.0879 |
| Nervous sys procs          | 0.0065 | 0.0803 | 0.0072 | 0.0846 |
| Endocrine procs            | 0.0009 | 0.0295 | 0.0008 | 0.0290 |
| Eye procs                  | 0.0003 | 0.0162 | 0.0003 | 0.0162 |
| Nose/mouth/Pharynx procs   | 0.0013 | 0.0358 | 0.0011 | 0.0328 |
| Infectious/Parasitic Dx    | 0.0318 | 0.1756 | 0.0296 | 0.1696 |
| Genitourinary Dx           | 0.0726 | 0.2594 | 0.0725 | 0.2593 |
| Skin Dx                    | 0.0201 | 0.1402 | 0.0176 | 0.1314 |
| Musculoskeletal Dx         | 0.0804 | 0.2719 | 0.0776 | 0.2676 |
| Congenital Anomalies       | 0.0034 | 0.0583 | 0.0039 | 0.0623 |
| Perinatal conditions       | 0.0001 | 0.0076 | 0.0001 | 0.0093 |
| Ill-Defined signs/Symptoms | 0.0950 | 0.2932 | 0.0887 | 0.2843 |
| Injury/poison              | 0.0468 | 0.2113 | 0.0479 | 0.2135 |
| Supp: health status        | 0.1097 | 0.3125 | 0.1074 | 0.3096 |
| External Injury            | 0.0114 | 0.1061 | 0.0136 | 0.1157 |

|                        |        |        |        |        |
|------------------------|--------|--------|--------|--------|
| Neoplasms              | 0.0224 | 0.1480 | 0.0203 | 0.1411 |
| Endocrine Dx           | 0.1419 | 0.3489 | 0.1331 | 0.3397 |
| Mental disorders       | 0.0707 | 0.2563 | 0.0663 | 0.2487 |
| Nervous sys dx         | 0.0519 | 0.2219 | 0.0486 | 0.2151 |
| Digestive sys Dx       | 0.0835 | 0.2767 | 0.0760 | 0.2650 |
| Ear procs              | 0.0000 | 0.0054 | 0.0001 | 0.0076 |
|                        |        |        |        |        |
| Outcomes               |        |        |        |        |
| All cause death        | 0.046  | 0.210  | 0.045  | 0.207  |
| All cause admissions   | 0.233  | 0.423  | 0.211  | 0.408  |
| Circulatory admissions | 0.199  | 0.399  | 0.181  | 0.385  |
| Respiratory admissions | 0.101  | 0.301  | 0.093  | 0.291  |

### Propensity score overlap

To ensure that the distribution of the covariates are overlapping in the region of high ad low pollution, we have plotted a histogram of the estimated propensity scores in both the high (> 12) and low pollution (< 12) groups, respectively (see Figure S1). We found that there is adequate overlap between these two distributions suggesting that positivity assumption is not violated in our study.

**Figure S1:** Distribution of the estimated propensity scores for the high and low exposure groups

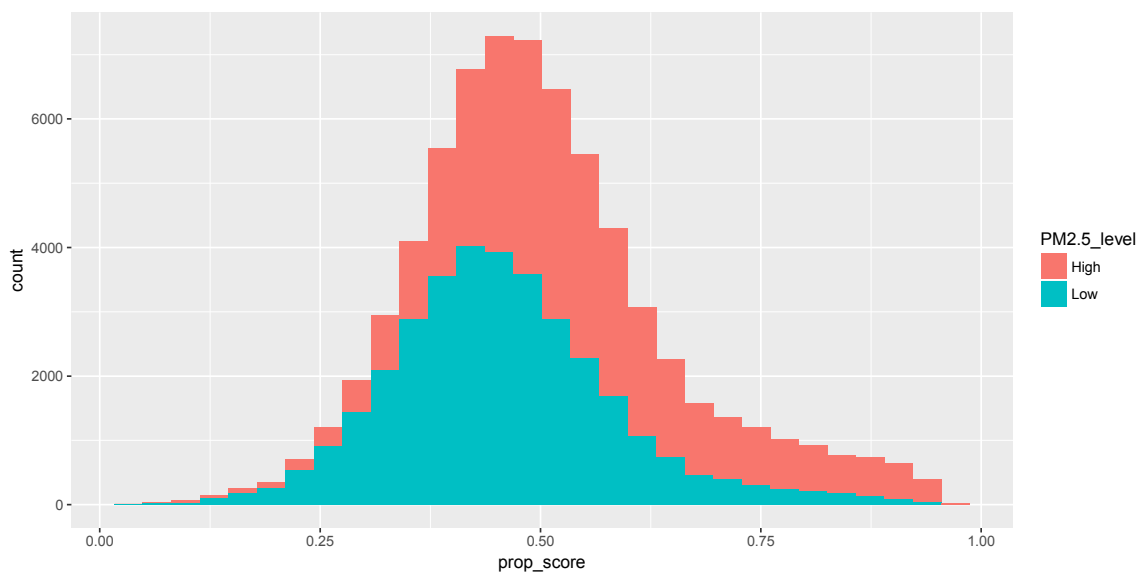

## Sensitivity Analyses

**Table S2: Summary of the main analysis and of the sensitivity analyses**

| Model name                                                                                                                                                                                                                           | Exposure variable                                                 | Adjusting for confounders                                                                                                      | Results reported in                             |
|--------------------------------------------------------------------------------------------------------------------------------------------------------------------------------------------------------------------------------------|-------------------------------------------------------------------|--------------------------------------------------------------------------------------------------------------------------------|-------------------------------------------------|
| Main Analysis:<br>Inverse probability weighting with Binary Exposure                                                                                                                                                                 | Binary (<12 for the full cohort, <8 for the low pollution cohort) | Inverse probability weighting                                                                                                  | Main manuscript Table 2, and Figure 4           |
| SA1: Continuous exposure, linear exposure-response function and confounding adjustment using a regression model                                                                                                                      | Continuous                                                        | Cox proportional hazard model, linear E-R function, potential confounders are included into the model as linear terms          | Supplementary material: Table S3, and Figure S2 |
| SA2: Continuous exposure, nonlinear (spline) exposure response function and adjustment using a regression model                                                                                                                      | Continuous                                                        | Cox proportional hazard model with a nonlinear E-R function, potential confounders are included into the model as linear terms | Supplementary material: Table S4, and Figure S3 |
| SA3: Low pollution cohort analysis where binary exposure is defined using the WHO cutoff of 10 $\mu\text{g}/\text{m}^3$ .                                                                                                            | Binary                                                            | Inverse probability weighting                                                                                                  | Supplementary material: Table S5, and Figure S4 |
| All analyses were tested for robustness against exclusion of all the behavioral risk factors measured from MCBS (e.g. smoking, BMI, etc.) from the confounding adjustment (exclusion of the 73 covariates available from MCBS only). |                                                                   |                                                                                                                                |                                                 |
| All analyses were done using the full cohort ( <b>N=32,119</b> ) and the low pollution cohort ( <b>N=18,144</b> )                                                                                                                    |                                                                   |                                                                                                                                |                                                 |

Main Analysis: Inverse probability weighting with Binary Exposure: In the main analyses we presented results by using inverse probability weighting (IPW). IPW estimates the effect of the exposure by re-weighting our sample using the stabilized inverse probability weights (Table 2, and Figure 4).

## Sensitivity Analyses

### SA1: Continuous exposure model

We also fitted to the data a Cox proportional hazard model with a linear E-R function, where the p=122 potential confounders are included into the model as linear terms. We define the continuous exposure as average of PM<sub>2.5</sub> two years prior the interview date.

Table S3 shows the estimated hazard ratios and confidence intervals. Hazards ratio estimates are calculated as exponents of the coefficients and confidence intervals are calculated based on robust variances accounting for multiple observations per patient. Our estimate for the effect of PM<sub>2.5</sub> on all cause mortality is comparable to the same estimate in Table 2 of the ACS although it is not statistically significant. The ACS study reports an estimated HR of 1.06 (1.02, 1.11) associated with a 10 µg/m<sup>3</sup> increase in PM<sub>2.5</sub>. This is largely consistent with our findings in light of differences between the two studies as outlined in Table 1 in the main text. For example, since the ACS study was conducted at an earlier time period with higher average PM<sub>2.5</sub> and a larger study population, it does not come as a surprise that their estimate is significant while ours is not.

Table S3: Hazard ratios showing the effect of an increase of 10 µg/m<sup>3</sup> increase in PM<sub>2.5</sub> obtained from fitting a CPH with the average exposure to PM<sub>2.5</sub> as the main exposure variable. Table reports 95% confidence intervals based on robust, sandwich variance estimators (Results of SA1).

|                             | Full cohort<br>N = 32,119<br>person years = 68,789 | Low pollution cohort,<br>N = 18,144<br>person years = 34,429 |
|-----------------------------|----------------------------------------------------|--------------------------------------------------------------|
| All cause mortality         | 0.96 (0.83, 1.12)                                  | 1.15 (0.83, 1.58)                                            |
| All cause hospitalization   | 1.12 (1.05, 1.20)                                  | 1.26 (1.09, 1.45)                                            |
| Circulatory hospitalization | 1.13 (1.05, 1.21)                                  | 1.31 (1.12, 1.53)                                            |
| Respiratory hospitalization | 1.10 (0.99, 1.21)                                  | 1.37 (1.10, 1.71)                                            |

Figure S2 shows the CPH estimates using the linear exposure term and after direct adjustment for confounders including and excluding MCBS variables and is similar to Figure 2 in the main analysis. One again we find that the results are consistent with the main analysis, suggesting that our estimates are robust to the exclusion of the MCBS variables into the model to adjust for confounding.

Figure S2: shows the estimated hazard ratios and 95% CI obtained by fitting a Cox Proportional Hazard Model (CPH) with a continuous exposure and confounding adjustment obtained by including the covariates linearly into the model. Estimates in blue are obtained by excluding from the model the MCBS variables. (Results of SA1)

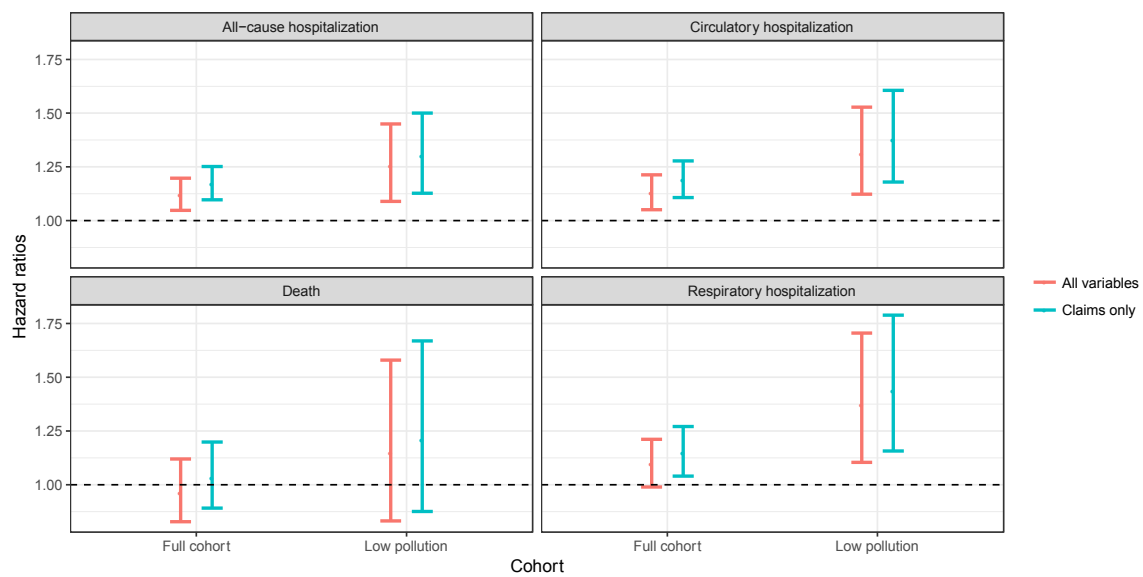

### SA2: Continuous Exposure and Cox Proportional Hazard Model with Non Linear Exposure-Response (ER) function

Table S4 shows the p-value of the Wald test for nested models testing as whether globally there is evidence of non-linearity in the ER function. P-values suggest that there might be a nonlinear relationship between exposure to PM<sub>2.5</sub> and circulatory hospitalizations in the low pollution cohort. Further investigations of this relationship are left for future work (Results for SA2).

Table S4: Wald test for the significance of the spline parameters

|                           | Low pollution cohort | Full cohort |
|---------------------------|----------------------|-------------|
| All cause mortality       | 0.3636               | 0.6730      |
| All cause hospitalization | 0.0128               | 0.2712      |



|                             |        |        |
|-----------------------------|--------|--------|
| Circulatory hospitalization | 0.0019 | 0.0358 |
| Respiratory hospitalization | 0.3481 | 0.1034 |

**Figure S3: Shows the exposure-response curve for PM<sub>2.5</sub> and the four outcomes looked at. The nonlinear curve was fit using splines with 3 degrees of freedom. (Results of SA2)**

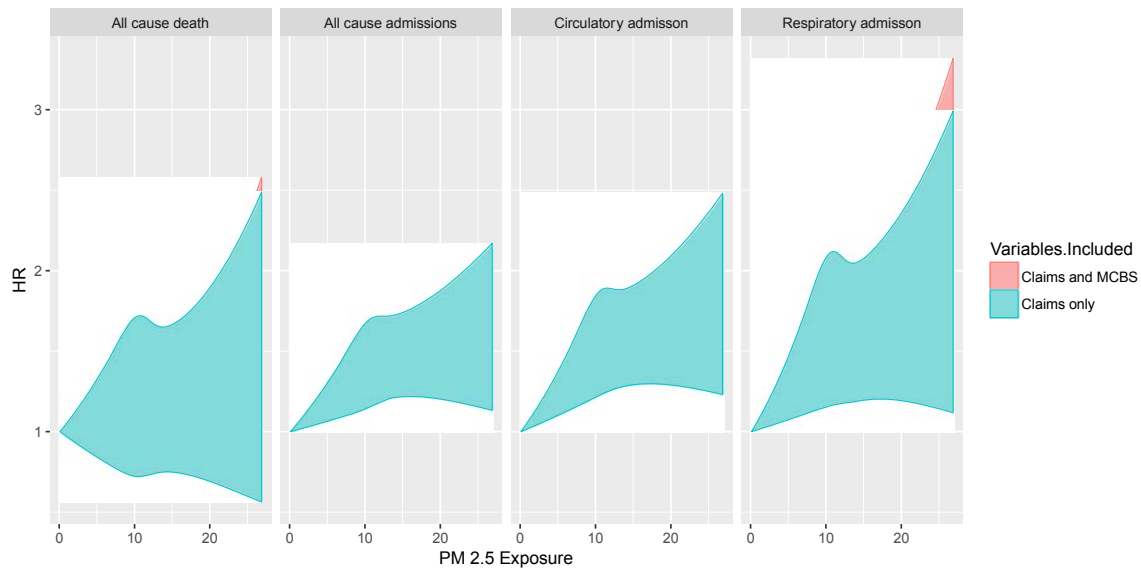

SA3: Low pollution cohort using cutoff of  $10 \mu\text{g}/\text{m}^3$ . This analysis again restricts subjects to those living in areas lower than  $12 \mu\text{g}/\text{m}^3$ , but now defines the binary exposure to be an indicator whether a subject lives in an area with average pollution levels below  $10 \mu\text{g}/\text{m}^3$  instead than  $8 \mu\text{g}/\text{m}^3$  as in the main analysis.

**Table S5: Effect estimates for low pollution cohort using the exposure to be an indicator that PM<sub>2.5</sub> is below  $10 \mu\text{g}/\text{m}^3$ .**

|                             |                                                                         |
|-----------------------------|-------------------------------------------------------------------------|
|                             | Low pollution cohort using WHO cutoff, N = 18,144 person years = 34,429 |
| All cause mortality         | 1.09 (0.98, 1.22)                                                       |
| All cause hospitalization   | 1.03 (0.98, 1.08)                                                       |
| Circulatory hospitalization | 1.03 (0.98, 1.09)                                                       |
| Respiratory hospitalization | 1.04 (0.97, 1.12)                                                       |

Figure S4: shows the estimated hazard ratios and 95% CI obtained by fitting a Cox Proportional Hazard Model (CPH) with a binary exposure and confounding adjustment done via inverse probability weighting. Estimates in blue are obtained by excluding from the PS model the MCBS variables. (Results of SA3)

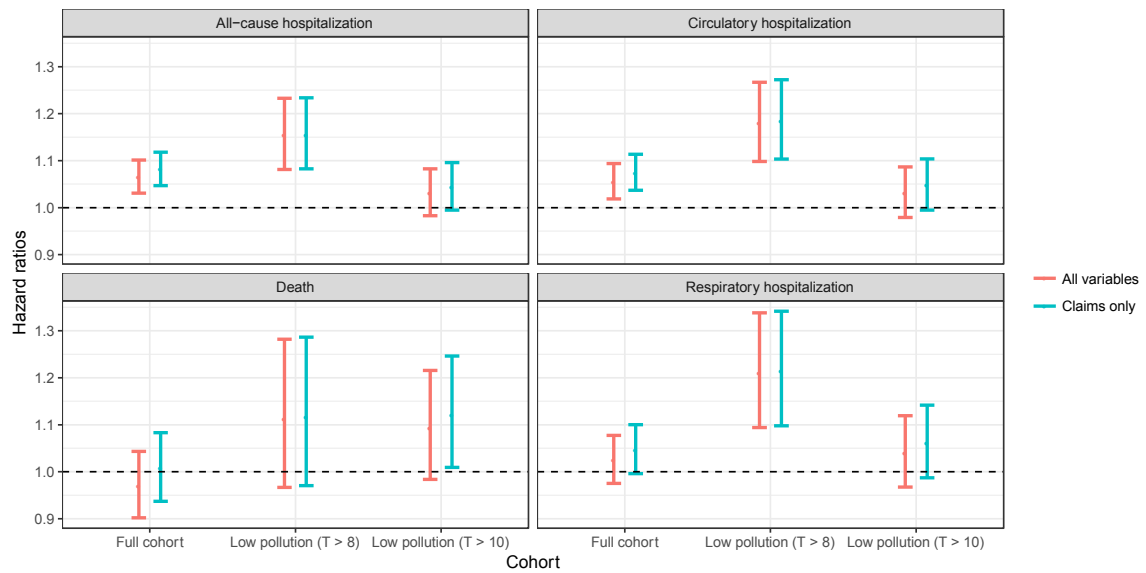

Supplement: NIHMS874613-supplement-supplemental_materials.pdf [file NIHMS874613-supplement-supplemental_materials.pdf]
